# Supplementary material
Source: ML conference proceedings conference paper supplement (https://openaccess.thecvf.com/content/CVPR2022/html/Yang_Vision-Language_Pre-Training_With_CVPR_2022_paper.html)
Supplement: Supplementary file 1 [file Yang_Vision-Language_Pre-Training_With_CVPR_2022_supplemental.pdf]

# Vision-Language Pre-Training with Triple Contrastive Learning

Jinyu Yang<sup>1</sup>, Jiali Duan<sup>2</sup>, Son Tran<sup>2</sup>, Yi Xu<sup>2</sup>, Sampath Chanda<sup>2</sup>, Liqun Chen<sup>2</sup>, Belinda Zeng<sup>2</sup>,  
Trishul Chilimbi<sup>2</sup>, and Junzhou Huang<sup>1</sup>

<sup>1</sup>University Of Texas at Arlington, <sup>2</sup>Amazon

jinyu.yang@mavs.uta.edu, jzhuang@uta.edu

{duajiali, sontran, yxaamzn, csampat, liquchen, zengb, trishulc}@amazon.com

## 1. Supplementary

This supplementary includes additional details that are not included in the main manuscript due to space limits.

### 1.1. Feature Visualization

We argue that the main reason for the competitive performance achieved by TCL is that it can learn better intra-modal representations which further contribute to cross-modal representation learning. To validate this assumption, we visualize the t-SNE of text features of the current state of the art [2] (left) and TCL (right) as shown in Figure 1. We can clearly see that the feature representations from TCL are more uniformly distributed, which is desirable for intra-modal retrieval tasks (e.g., text-text retrieval), implying that TCL can learn better intra-modal representations.

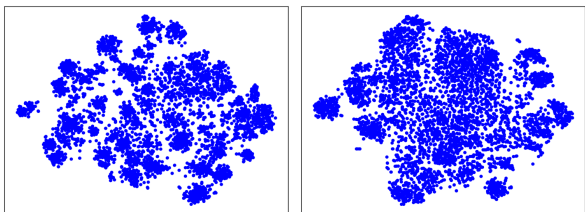

Figure 1. t-SNE visualization of learned features on the COCO dataset.

### 1.2. Ablation study of the momentum coefficient

To rule out the probability that different experimental settings impact model performance, we set momentum coefficient  $m = 0.995$  by following [2]. We retrain our model on COCO [3] with different  $m$  to learn the impact of the momentum. Table 1 shows the performance on zero-shot image-text retrieval on Flickr30K [4] and COCO datasets with the evaluation criteria R@1/R@5/R@10. Different from MoCo [1] which claims that a reasonable momentum

should be in 0.99~0.9999, our results suggest that 0.5 performs the best.

| $m$   | MSCOCO (5K)    |      |                 |      |      |      | Flickr30K (1K) |      |                 |      |      |      |
|-------|----------------|------|-----------------|------|------|------|----------------|------|-----------------|------|------|------|
|       | Text Retrieval |      | Image Retrieval |      |      |      | Text Retrieval |      | Image Retrieval |      |      |      |
|       | R@1            | R@5  | R@10            | R@1  | R@5  | R@10 | R@1            | R@5  | R@10            | R@1  | R@5  | R@10 |
| 0.995 | 60.6           | 85.9 | 92.2            | 46.0 | 74.1 | 83.1 | 67.2           | 89.3 | 94.4            | 52.7 | 79.0 | 85.7 |
| 0.9   | 59.7           | 85.1 | 92.0            | 45.5 | 74.1 | 83.5 | 68.0           | 89.6 | 94.9            | 53.3 | 79.8 | 86.3 |
| 0.5   | 61.6           | 85.6 | 92.2            | 46.5 | 74.9 | 84.0 | 69.7           | 89.1 | 94.3            | 54.7 | 79.9 | 86.9 |
| 0.0   | 61.3           | 85.8 | 92.7            | 46.4 | 75.2 | 84.4 | 70.0           | 88.6 | 93.0            | 53.3 | 78.5 | 85.6 |

Table 1. Ablation study of the momentum coefficient  $m$ .

## References

- [1] Kaiming He, Haoqi Fan, Yuxin Wu, Saining Xie, and Ross Girshick. Momentum contrast for unsupervised visual representation learning. In *Proceedings of the IEEE/CVF Conference on Computer Vision and Pattern Recognition*, pages 9729–9738, 2020. 1
- [2] Junnan Li, Ramprasaath R Selvaraju, Akhilesh Deepak Gotmare, Shafiq Joty, Caiming Xiong, and Steven Hoi. Align before fuse: Vision and language representation learning with momentum distillation. *arXiv preprint arXiv:2107.07651*, 2021. 1
- [3] Tsung-Yi Lin, Michael Maire, Serge Belongie, James Hays, Pietro Perona, Deva Ramanan, Piotr Dollár, and C Lawrence Zitnick. Microsoft coco: Common objects in context. In *European conference on computer vision*, pages 740–755. Springer, 2014. 1
- [4] Bryan A Plummer, Liwei Wang, Chris M Cervantes, Juan C Caicedo, Julia Hockenmaier, and Svetlana Lazebnik. Flickr30k entities: Collecting region-to-phrase correspondences for richer image-to-sentence models. In *Proceedings of the IEEE international conference on computer vision*, pages 2641–2649, 2015. 1
